# Supplementary material
Source: Springer Nature journal article supplement (https://www.springermedizin.de/resource/supplementary/12984_2010_250_MOESM2_ESM.pdf/9605632)

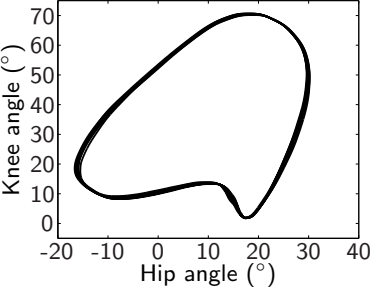

(a) Pos

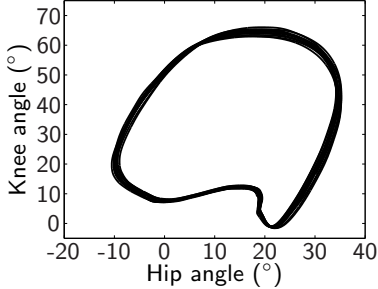

(b) SOFT

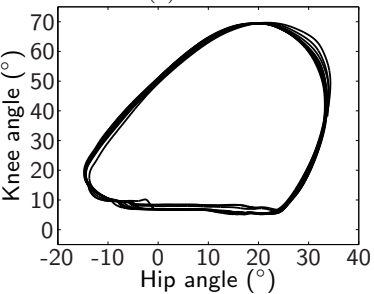

(c) COOP+

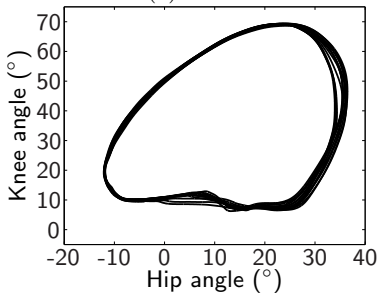

(d) COOP

Supplement: MOESM2 [file 9605632]
